# Supplementary material for: Clonidine or remifentanil for adequate surgical conditions in patients undergoing endoscopic sinus surgery: a randomized study
Source: PeerJ. 2017 May 23;5:e3370. doi: 10.7717/peerj.3370 (PMC5444371; doi:10.7717/peerj.3370)
Supplement: Supplemental Information 1 [file peerj-05-3370-s001.xlsx]

## Sheet: Feuil1
no	sex	weight	height	bmi	surgeon	asa	tobacco	cortisone	mackay lund	clo.remi	clo total (mcg/kg)	remi total (mg)	suf total (mcg)	fromm15	frommE	ephed(mg)	failure (0-1)	start surgery	end surgery	stop sevo	extub	eyes openin	recovery room discharge	MAP 0	HR 0	MAP 15	HR 15	MAPA	HRA	sp02 recovery (avgd)	preop spo2	nrs in	nrs out	ramsay in	ramsay out	aldrete in	aldrete out	ponv	hypertension	bradyc	tachyc	hypotension	o2 discharge	piritramide(mg)
1	m	97	179	30.2737	1	2	1	0	3	0	3	0	15	3	3	0	0	12:45:00	13:08:00	13:08:00	13:18:00	13:18:00	14:00:00	92	77	67	63	67	61	99	100	0	0	2	2	8	9	0	0	0	0	0	0	0
2	m	78	171	26.6749	0	2	0	0	8	0	2	0	10	2	2	0	0	15:55:00	16:53:00	16:49:00	17:02:00	17:02:00	18:00:00	67	62	63	66	63	62	99	100	3	3	2	2	8	9	0	0	0	0	0	0	0
3	f	93	164	34.5776	0	2	0	0	2	1	0	584	0	3	3	21	0	14:40:00	15:02:00	15:07:00	15:16:00	15:16:00	16:44:00	67	60	52	58	57	57	98	100	0	3	2	2	8	10	0	0	0	0	0	0	0
4	f	57	150	25.3333	1	2	0	0	1	1	0	341	0	1	1	3	0	09:18:00	09:37:00	09:40:00	09:49:00	09:54:00	11:25:00	71	66	50	64	54	64	99	100	0	3	2	2	8	9	0	1	0	0	0	0	12
5	f	71	155	29.5525	1	2	0	0	1	1	0	1999	0	4	4	0	0	12:00:00	13:07:00	13:07:00	13:22:00	13:35:00	14:42:00	75	82	55	74	60	74	98	100	0	1	2	2	10	10	0	0	0	0	0	0	0
6	f	68	170	23.5294	0	2	0	0	2	0	2	0	10	2	3	3	0	12:13:00	12:50:00	12:50:00	13:05:00	13:05:00	14:28:00	107	84	48	46	51	51	98	100	0	1	3	2	10	10	0	0	0	0	0	0	4
7	m	70	175	22.8571	0	1	0	1	20	1	0	1354	0	4	2	6	0	15:50:00	17:00:00	17:00:00	17:17:00	17:17:00	13:35:00	80	95	50	74	56	72	100	100	1	3	3	2	9	10	0	0	0	0	0	0	4
8	m	96	182	28.982	1	2	0	0	14	0	2	0	15	1	2	15	0	12:00:00	12:57:00	12:54:00	13:02:00	13:03:00	14:23:00	88	82	53	55	54	56	99	100	0	2	2	2	9	9	0	0	0	0	0	0	2
9	f	50	155	20.8117	0	2	0	0	9	0	3	0	7.5	4	4	45	0	11:08:00	12:06:00	12:04:00	12:09:00	12:17:00	13:08:00	70	68	51	57	54	53	100	100	0	3	2	2	8	10	0	0	0	0	0	0	0
10	m	71	160	27.7344	0	2	0	0	2	1	0	747	0	1	2	9	0	11:10:00	12:01:00	12:01:00	12:18:00	12:18:00	14:00:00	97	72	62	67	62	65	96	97	0	1	5	2	8	9	0	0	0	0	0	1	6
11	m	104	177	33.1961	0	2	1	0	5	1	0	1433	0	2	2	18	0	08:51:00	10:07:00	10:05:00	10:13:00	10:13:00	12:20:00	92	69	63	55	64	58	97	97	6	2	2	2	10	9	0	0	0	0	0	1	0
12	f	65	172	21.9713	0	2	0	0	8	1	0	898	0	3	3	15	0	11:07:00	12:26:00	12:26:00	12:38:00	12:38:00	13:28:00	73	57	58	56	56	54	99	100	0	0	2	2	9	10	0	0	0	0	0	0	0
13	f	78	166	28.306	1	2	0	0	1	0	2	0	12.5	1	0	12	0	11:49:00	12:36:00	13:37:00	13:46:00	13:46:00	14:50:00	95	56	53	63	60	64	98	94	0	0	2	2	8	10	0	0	0	0	0	0	0
14	f	63	156	25.8876	0	2	0	0	3	1	0	501	0	2	2	0	0	09:09:00	09:39:00	09:37:00	09:50:00	09:50:00	11:06:00	81	73	61	75	59	70	99	100	0	0	2	2	10	10	0	0	0	0	0	0	0
15	m	95	180	29.321	0	2	0	0	7	0	2	0	15	2	3	12	0	15:16:00	16:50:00	16:48:00	16:58:00	16:58:00	17:45:00	108	67	62	63	61	65	96	100	0	0	2	2	8	10	0	0	0	0	0	0	0
16	m	80	185	23.3747	0	2	0	0	12	0	2	0	17.5	1	5	12	0	10:41:00	11:45:00	11:43:00	11:59:00	11:59:00	13:35:00	72	88	50	80	57	78	99	99	0	1	5	3	7	10	0	0	0	0	0	0	0
17	f	75	168	26.5731	0	2	1	0	9	0	2	0	10	1	2	15	0	12:40:00	13:03:00	13:01:00	13:19:00	13:19:00	14:33:00	90	71	68	84	62	81	99	100	0	0	2	2	7	10	0	0	0	0	0	0	4
18	m	70	165	25.7117	1	2	0	0	9	1	0	518	0	2	2	0	0	14:00:00	14:24:00	14:21:00	14:35:00	14:35:00	15:29:00	99	94	56	83	54	83	99	100	0	4	2	2	10	10	0	0	0	0	0	0	4
19	f	95	163	35.756	0	2	0	0	1	0	2	0	15	2	2	12	0	08:44:00	09:00:00	09:05:00	09:25:00	09:31:00	10:50:00	100	79	47	79	51	82	97	100	0	2	3	2	8	10	0	0	0	0	0	0	0
20	f	80	170	27.6817	1	1	1	0	1	0	2	0	12	2	2	0	0	10:20:00	10:52:00	10:52:00	11:00:00	11:00:00	12:10:00	73	75	54	83	56	79	97	97	8	1	1	2	9	10	0	0	0	0	0	0	0
21	m	85	177	27.1314	1	2	1	0	5	0	2	0	17.5	2	4	0	0	10:42:00	12:26:00	12:20:00	12:36:00	12:36:00	13:40:00	92	57	76	61	73	56	97	96	0	0	2	2	8	10	0	0	0	0	0	0	0
22	m	76	186	21.9679	1	2	0	0	10	1	0	931	0	2	1	15	0	09:59:00	11:32:00	11:30:00	11:50:00	11:50:00	12:46:00	84	66	58	52	56	55	98	100	0	0	2	2	10	10	0	0	0	0	0	0	0
23	f	75	162	28.578	0	2	0	0	12	1	0	666	0	2	2	24	0	09:53:00	10:58:00	10:57:00	11:09:00	11:09:00	12:25:00	101	72	51	62	57	62	97	100	0	0	2	2	10	10	0	0	0	0	0	0	0
24	f	63	165	23.1405	0	1	0	0	1	1	0	582	0	2	2	3	0	11:59:00	12:37:00	12:35:00	12:44:00	12:44:00	13:46:00	135	76	58	59	63	60	100	94	2	2	2	2	10	10	0	0	0	0	0	0	0
25	f	50	153	21.3593	0	2	1	0	2	0	2	0	7.5	2	2	6	0	13:28:00	13:49:00	13:49:00	14:03:00	14:03:00	15:17:00	78	57	51	56	60	56	99	96	0	0	2	2	8	10	0	0	0	0	0	0	0
26	f	50	155	20.8117	0	2	0	0	4	1	0	404	0	3	2	12	0	08:46:00	09:08:00	09:10:00	09:25:00	09:31:00	10:30:00	77	65	52	62	47	59	100	99	0	0	2	2	10	10	0	0	0	0	0	0	0
27	m	87	184	25.6971	0	1	1	0	13	0	3	0	20	4	3	0	0	12:15:00	13:55:00	14:00:00	14:20:00	14:30:00	15:45:00	75	61	67	103	67	95	96	100	0	0	3	2	9	10	0	0	0	0	0	0	0
28	m	100	170	34.6021	1	2	0	0	1	1	0	1103	0	0	0	36	0	08:35:00	09:15:00	10:40:00	10:45:00	10:50:00	13:10:00	121	87	70	58	50	68	99	96	0	3	3	2	8	10	0	0	0	0	0	0	6
29	m	75	181	22.8931	0	2	0	0	20	0	2	0	17.5	3	3	6	0	10:29:00	12:05:00	12:03:00	12:13:00	12:24:00	13:45:00	94	65	59	54	65	57	98	100	0	0	5	2	8	10	0	0	0	0	0	0	0
30	m	60	170	20.7612	1	2	0	0	6	1	0	1338	0	1	2	3	0	11:30:00	13:04:00	13:04:00	13:25:00	13:25:00	14:35:00	93	74	56	55	60	52	99	100	0	2	5	2	8	10	0	0	0	0	0	0	4
31	f	47	159	18.591	1	2	1	0	8	0	3	0	8	2	2	0	0	10:25:00	10:58:00	10:52:00	11:01:00	11:08:00	12:27:00	110	62	56	56	57	59	98	100	0	0	2	2	8	10	0	0	0	0	0	0	0
32	f	65	166	23.5883	1	2	1	0	5	0	3	0	10	5	3	0	0	13:42:00	14:13:00	14:13:00	14:23:00	14:26:00	16:04:00	78	77	63	80	65	77	98	95	5	0	3	2	7	10	0	0	0	0	0	0	0
34	f	74	165	27.1809	0	2	1	0	4	0	2	0	15	3	3	0	0	13:32:00	14:31:00	14:31:00	14:40:00	14:45:00	17:00:00	82	70	70	71	67	72	98	100	0	0	2	2	8	10	0	0	0	0	0	0	0
33	f	67	163	25.2174	0	2	0	1	3	1	0	518	0	2	2	30	0	08:50:00	08:58:00	08:59:00	09:08:00	09:08:00	10:29:00	94	81	79	82	51	72	98	96	0	0	2	2	8	9	0	0	0	0	0	1	0
35	m	70	170	24.2215	0	2	0	1	9	0	3	0	15	2	3	9	0	12:36:00	13:30:00	13:30:00	13:52:00	13:52:00	14:52:00	96	65	58	76	66	63	98	100	0	0	3	2	8	10	0	0	0	0	0	0	0
36	m	90	172	30.4218	1	2	0	0	14	1	0	2347	0	0	1	12	0	10:44:00	11:37:00	11:37:00	11:42:00	11:42:00	15:17:00	97	75	48	65	52	64	97	97	2	1	2	2	8	10	0	0	0	0	0	0	0
37	f	40	158	16.0231	1	2	0	0	8	1	0	977	0	1	3	6	0	12:32:00	13:13:00	13:13:00	13:27:00	13:28:00	14:30:00	84	53	55	53	65	58	100	100	0	2	3	2	9	10	0	0	0	0	0	0	0
38	f	100	170	34.6021	0	2	0	1	8	1	0	2250	0	3	3	9	0	10:02:00	11:37:00	11:37:00	11:55:00	11:55:00	13:13:00	90	75	53	71	53	70	100	100	0	2	2	2	8	10	0	0	0	0	0	0	0
39	f	90	160	35.1562	1	2	0	0	3	1	0	2050	0	3	3	0	0	08:20:00	09:25:00	09:22:00	09:32:00	09:34:00	10:30:00	75	85	64	72	59	68	98	96	0	0	2	2	10	10	0	0	0	0	0	0	0
40	m	75	176	24.2123	0	1	0	0	7	0	2	0	10	1	1	3	0	13:04:00	14:18:00	14:15:00	14:26:00	15:00:00	15:40:00	79	96	60	77	56	76	99	100	0	0	6	2	4	10	0	0	0	0	1	0	0
41	f	61	172	20.6193	0	1	0	0	3	0	2	0	9.15	3	3	0	0	08:52:00	09:18:00	09:18:00	09:31:00	09:41:00	10:40:00	77	66	52	75	60	69	100	100	0	0	3	2	8	10	0	0	0	0	0	0	0
42	m	75	179	23.4075	0	2	0	1	24	1	0	1575	0	4	4	0	0	14:17:00	16:30:00	16:37:00	16:47:00	16:47:00	19:00:00	72	69	63	75	67	81	94	97	1	0	1	2	8	10	0	0	0	0	0	1	2
44	m	71	159	28.0843	0	2	0	0	4	0	3	0	10	2	2	0	0	12:25:00	13:37:00	13:36:00	13:42:00	14:00:00	15:05:00	93	68	66	73	69	72	96	99	0	2	5	2	5	9	0	0	0	0	0	1	0
43	f	75	162	28.578	0	2	0	0	13	1	0	2450	0	2	2	30	0	08:55:00	09:52:00	09:52:00	10:05:00	10:08:00	10:55:00	121	69	56	59	59	61	97	100	0	0	2	2	10	10	0	0	0	0	0	0	0
45	m	84	186	24.2803	1	2	1	0	10	1	0	3125	0	4	4	3	0	08:32:00	10:07:00	10:07:00	10:25:00	10:26:00	12:00:00	87	50	51	54	50	54	100	100	0	8	2	2	9	9	0	0	0	0	0	0	12
46	m	80	174	26.4236	1	1	0	0	5	0	3	0	12.5	1	1	0	0	14:19:00	15:12:00	15:07:00	15:27:00	15:27:00	16:15:00	76	71	64	65	59	70	98	99	0	0	2	2	9	10	0	0	0	0	0	0	0
47	f	65	166	23.5883	0	2	0	0	6	0	2	0	10	1	2	6	0	09:07:00	09:55:00	09:55:00	10:11:00	10:11:00	11:10:00	105	66	84	70	62	73	94	100	0	0	2	2	10	10	0	0	0	0	0	0	0
48	f	66	151	28.9461	0	2	0	0	12	1	0	1980	0	2	2	6	0	10:55:00	12:22:00	12:22:00	12:35:00	12:40:00	13:30:00	99	96	54	79	55	77	96	100	0	1	2	2	10	10	0	0	0	0	0	1	0
49	f	48	165	17.6309	0	2	1	0	7	0	3	0	7.5	3	3	0	0	13:22:00	13:54:00	13:54:00	14:02:00	14:05:00	15:10:00	87	83	82	96	66	89	97	100	0	1	3	2	9	10	0	0	0	0	0	0	0
50	m	110	186	31.7956	0	2	0	0	2	1	0	4050	0	2	4	18	0	15:10:00	17:10:00	17:10:00	17:25:00	17:35:00	18:40:00	93	71	70	72	65	67	95	95	0	0	3	2	8	9	0	0	0	0	0	1	0
51	m	86	170	29.7578	1	1	0	0	10	0	3	0	10	2	2	0	0	10:15:00	11:25:00	11:20:00	11:30:00	11:55:00	13:30:00	91	64	79	83	72	75	99	100	0	1	4	2	7	10	0	0	0	0	0	0	0
52	f	85	160	33.2031	1	2	0	0	3	0	2	0	10	2	3	0	0	14:10:00	14:48:00	14:45:00	14:50:00	14:50:00	16:00:00	72	64	72	64	77	59	96	100	0	0	2	2	9	10	0	0	0	0	0	0	0
53	m	130	184	38.3979	1	2	0	0	4	1	0	6950	0	3	1	0	0	08:39:00	09:11:00	10:43:00	10:45:00	11:10:00	12:31:00	88	82	60	58	63	64	97	98	0	4	6	2	5	10	0	0	0	0	0	1	4
54	f	106	167	38.0078	0	2	1	0	9	0	2	0	16	3	3	21	0	10:11:00	10:55:00	10:55:00	11:05:00	11:08:00	13:22:00	78	54	70	83	59	64	96	100	0	2	4	2	8	10	0	0	0	0	1	0	0
55	f	54	160	21.0938	0	2	0	1	20	0	2	0	10	1	3	0	0	10:28:00	11:45:00	14:44:00	11:49:00	11:52:00	14:28:00	80	67	46	43	64	47	99	97	0	0	3	2	6	10	0	0	0	0	0	0	0
56	f	63	170	21.7993	0	2	0	0	14	0	2	0	10	2	2	0	0	14:20:00	16:02:00	16:00:00	16:12:00	16:20:00	17:05:00	125	86	56	53	60	55	95	99	0	0	2	2	10	10	0	0	0	0	0	0	0
57	f	69	165	25.3444	0	2	0	0	2	1	0	1535	0	2	2	21	0	11:58:00	12:40:00	12:42:00	12:55:00	12:56:00	14:00:00	103	60	44	41	51	41	98	100	0	0	2	2	10	10	0	0	0	0	0	0	0
58	f	78	171	26.6749	0	1	0	0	10	1	0	1680	0	3	3	6	0	14:13:00	15:15:00	15:11:00	15:23:00	15:22:00	16:29:00	85	92	63	74	64	74	99	100	4	1	2	2	10	10	0	0	0	1	0	0	2
59	m	59	166	21.4109	0	3	0	0	12	1	0	1279	0	2	2	12	0	16:19:00	17:16:00	17:11:00	17:19:00	17:19:00	19:10:00	117	79	61	51	55	50	99	100	3	0	2	2	8	10	0	0	0	0	0	0	0
